# Supplementary material for: Second-shell modulation on porphyrin-like Pt single atom catalysts for boosting oxygen reduction reaction
Source: Royal Society of Chemistry journal article supplement (doi:10.1039/d4sc03369h), 2024-01-01
Supplement: d4sc03369h1.pdf [file d4sc03369h1.pdf]

Electronic Supplementary Information

## **Second-shell modulation on porphyrin-like Pt single atom catalysts for boosting oxygen reduction reaction**

Tayyaba Najam,<sup>ab</sup> Syed Shoaib Ahmad Shah,<sup>c</sup> Hanqing Yin,<sup>d</sup> Xin Xiao,<sup>e</sup> Shamraiz Talib,<sup>f</sup> Qianqian Ji,<sup>a</sup> Yonggui Deng,<sup>g</sup> Muhammad Sufyan Javed,<sup>a</sup> Jie Hu,<sup>a</sup> Ruo Zhao,<sup>a</sup> Aijun Du,<sup>d</sup> Xingke Cai,<sup>\*a</sup> and Qiang Xu<sup>\*eh</sup>

<sup>a</sup> Institute for Advanced Study, Shenzhen University, Shenzhen 518060, China. E-mail: cai.xingke@szu.edu.cn

<sup>b</sup> College of Physics and Optoelectronic Engineering, Shenzhen University, Shenzhen 518060, China.

<sup>c</sup> Department of Chemistry, School of Natural Sciences, National University of Sciences and Technology, Islamabad 44000, Pakistan.

<sup>d</sup> QUT Centre for Materials Science, Queensland University of Technology (QUT), 2 George Street, Brisbane, 4000, Australia.

<sup>e</sup> Shenzhen Key Laboratory of Micro/Nano-Porous Functional Materials (SKLPM), SUSTech-Kyoto University Advanced Energy Materials Joint Innovation Laboratory (SKAEM-JIL), Department of Chemistry and Department of Materials Science and Engineering, Southern University of Science and Technology (SUSTech), Shenzhen 518055, China. E-mail: xuq@sustech.edu.cn.

<sup>f</sup> Advanced Materials Chemistry Centre (AMCC), SAN Campus, Khalifa University, Abu Dhabi, P.O. Box 127788, United Arab Emirates

<sup>g</sup> College of Mechatronics and Control Engineering, Shenzhen University, Shenzhen 518060, PR China.

<sup>h</sup> Institute for Integrated Cell-Material Sciences (WPI-iCeMS), Kyoto University, Yoshida, Sakyo-ku, Kyoto 606-8501, Japan.

## **1. Experimental Section**

### **1.1 XAFS Measurements**

The X-ray absorption fine structure spectra (Pt L<sub>3</sub>-edge) were collected at BL14W beamline in Shanghai Synchrotron Radiation Facility (SSRF). The storage rings of SSRF was operated at 3.5 GeV with a stable current of 200 mA. Using Si(111) double-crystal monochromator, the data collection were carried out in fluorescence mode using Lytle detector. All spectra were collected in ambient conditions. The data analysis was performed using the Athena/Artemis software packages.

### **1.2 Computational Method**

All first-principle calculations were performed by the Vienna Ab-initio Simulation Package (VASP) considering of spin-polarization effect<sup>1, 2</sup>. The interaction between the ions and electrons were described by the projector-augmented wave (PAW)<sup>3</sup> method and the generalized gradient approximation in the Perdew–Burke–Ernzerhof (PBE)<sup>4, 5</sup> form was adopted. A DFT + D3 semiempirical correction was described via Grimme’s scheme<sup>6</sup>. The cut-off energy was set to be 400 eV, and the force and energy convergence threshold was set to be  $10^{-2}$  eV/Å and  $10^{-5}$  eV, separately. The PtN4(P) active centers were constructed in a 6\*6 graphene supercell by replacing certain carbon atoms with heterogeneous dopants. Vacuum layer of at least 20 Å was applied to avoid the interactions from adjacent periodical images in -z direction. The Gibbs free energy change ( $\Delta G$ ) of each elemental phase was calculated using the standard hydrogen electrode (SHE)<sup>7</sup>.

The following are the four electron reaction steps for ORR processes<sup>8</sup>:

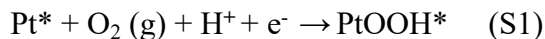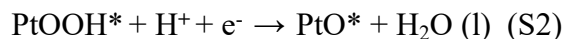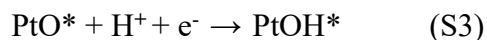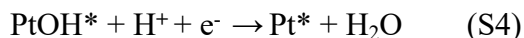

The Gibbs free energy difference for all of the above elementary steps ( $\Delta G_{\text{OOH}^*}$ ,  $\Delta G_{\text{O}^*}$ ,  $\Delta G_{\text{OH}^*}$ ) that include an electron transfer is calculated by using the following equations:

$$\Delta G = \Delta E + \Delta \text{ZPE} - T\Delta S + \Delta G_{\text{U}} + \Delta G_{\text{pH}} \quad (\text{S5})$$

The energy difference between the free standing and adsorption states of reaction intermediates, changes in zero-point energies and entropy, are represented by  $\Delta E$ ,  $\Delta \text{ZPE}$  and  $\Delta S$ . The adsorption energies of  $\Delta E$  are derived directly from DFT calculations. The  $\Delta \text{ZPE}$  stands for change in zero-point energy,  $T$  stands for temperature ( $T = 298.15$ ), and  $\Delta S$  stands for entropy change, which are accomplished from the vibrational frequency.  $\Delta G_{\text{U}} = -eU$ , denotes the potential based on the SHE, where  $e$  and  $U$  are the number of electrons transferred.  $\Delta G_{\text{pH}}$  stands for the Gibbs free energy correction of pH, which is determined using the formula:  $\Delta G_{\text{pH}} = -k_{\text{B}}T \ln 10^* \text{pH}$ , where  $k_{\text{B}}$  represents the Boltzmann constant ( $1.380649 \times 10^{-23} \text{ JK}^{-1}$ ) and  $T$  indicates a temperature of 298.15

k. The NIST database was used to obtain the vibrational frequencies and entropies of molecules in the gas phase.

The  $\Delta G$  of four elementary steps for ORR processes can be defined as:  $\Delta G_1 = \Delta G_{\text{OOH}^*} - 4.92$ ,  $\Delta G_2 = \Delta G_{\text{O}^*} - \Delta G_{\text{OOH}^*}$ ,  $\Delta G_3 = \Delta G_{\text{OH}^*} - \Delta G_{\text{O}^*}$ ,  $\Delta G_4 = \Delta G_{\text{OH}^*}$ .

The overpotential ( $\eta$ ) used to further validate the catalytic activity of ORR would be derived using the following equations if the  $\Delta G$  values of all four elementary steps are different:

$$\eta = \max \{ \Delta G_1, \Delta G_2, \Delta G_3, \Delta G_4 \} / e + 1.23 \quad (\text{S6}).$$

The exact adsorption energy of  $\text{ClO}_4^-$  was calculated as below:

$$\Delta E_{\text{ads}} = E(*\text{ClO}_4) - E(\text{surface}) - E(\text{ClO}_4^-) + E_{\text{correction}} \quad (\text{S7}),$$

where  $E_{\text{correction}}$  contains the correction of the standard formation energy of  $\text{HClO}_4$  and  $\text{ClO}_4^-$  of both gas and liquid phase and can be derived from experimental observation. Unfortunately, we didn't find their exact values yet it shouldn't affect the general trend of  $\text{ClO}_4^-$  adsorption on different SACs, because the correction represents only a constant shift when comparing the adsorption energies. Meanwhile, the energy of  $\text{ClO}_4^-$  ion was also inaccurate due to the limitation of our calculational methods, but it also has no influence on the trend because the error is constant as well.

## 2. Figures and Tables

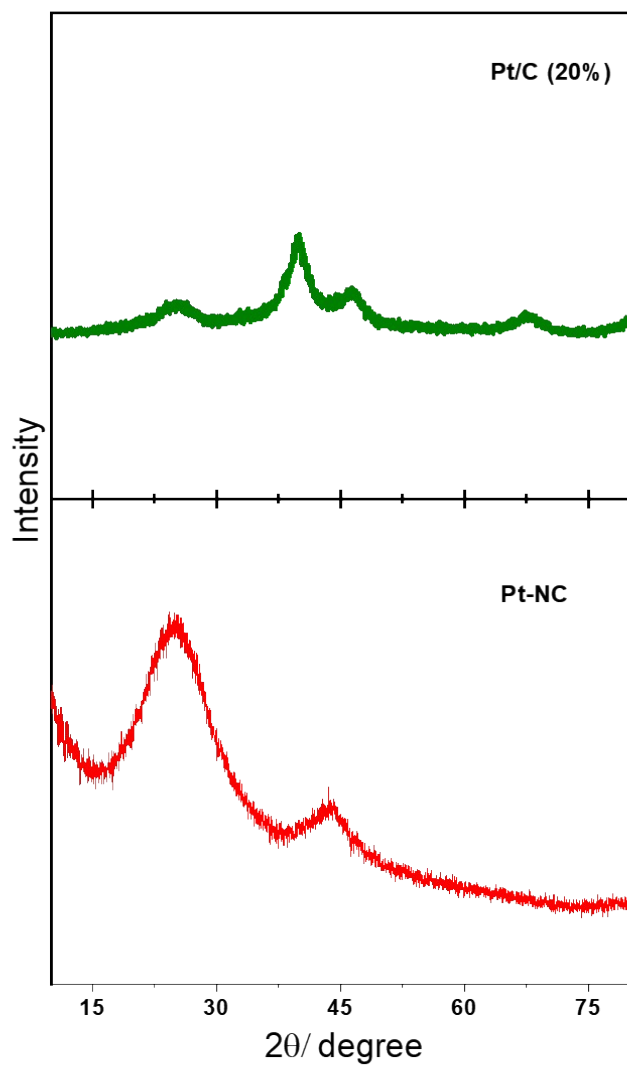

**Fig. S1** XRD comparative analysis of commercial Pt/C (20%) and Pt-NC with a Pt content of 0.3wt%.

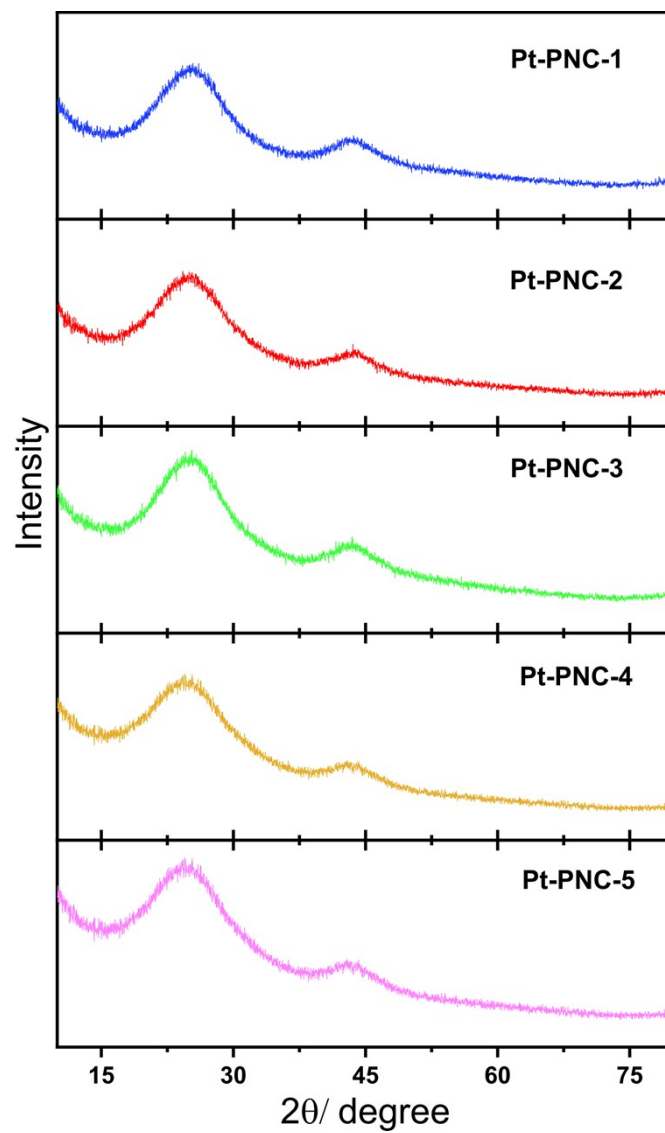

**Fig. S2** XRD comparative analysis of Pt-PNC with varying Pt-loading.

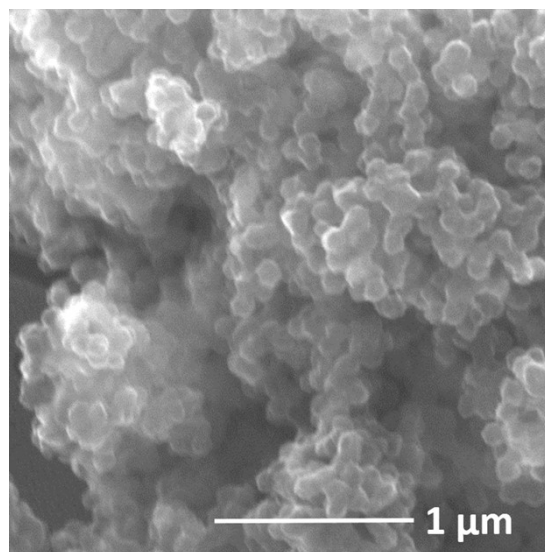

**Fig. S3** Typical SEM image of Pt@ZIF-8.

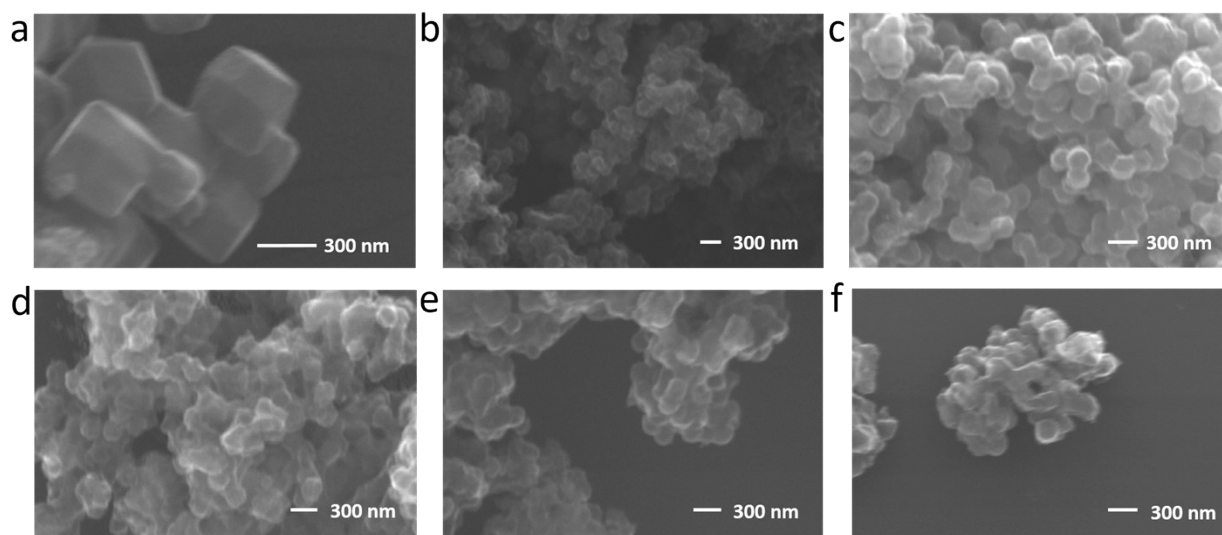

**Fig. S4** SEM images of (a) PNC, (b) Pt-PNC-1, (c) Pt-PNC-2, (d) Pt-PNC-3, (e) Pt-PNC-4, (f) Pt-PNC-5.

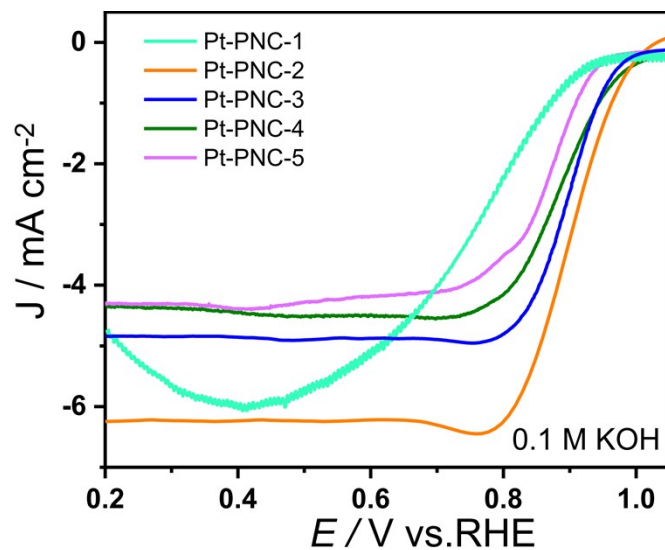

**Fig. S5** ORR comparative study of Pt-PNC with varying Pt loading in 0.1 M KOH.

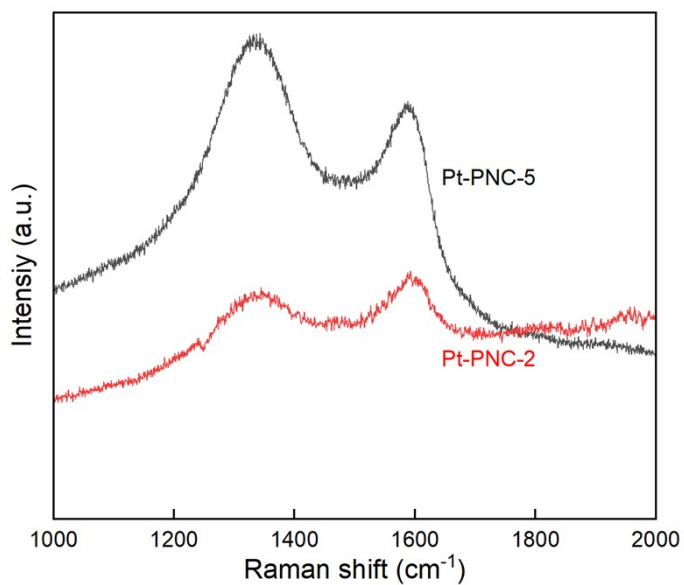

**Fig. S6** Raman spectra of the catalysts determining the defects in the support. The  $I_D/I_G$  value has increased from 0.94 to 1.23 by increasing the Pt concentration doped inside from 0.22% to 0.33%.

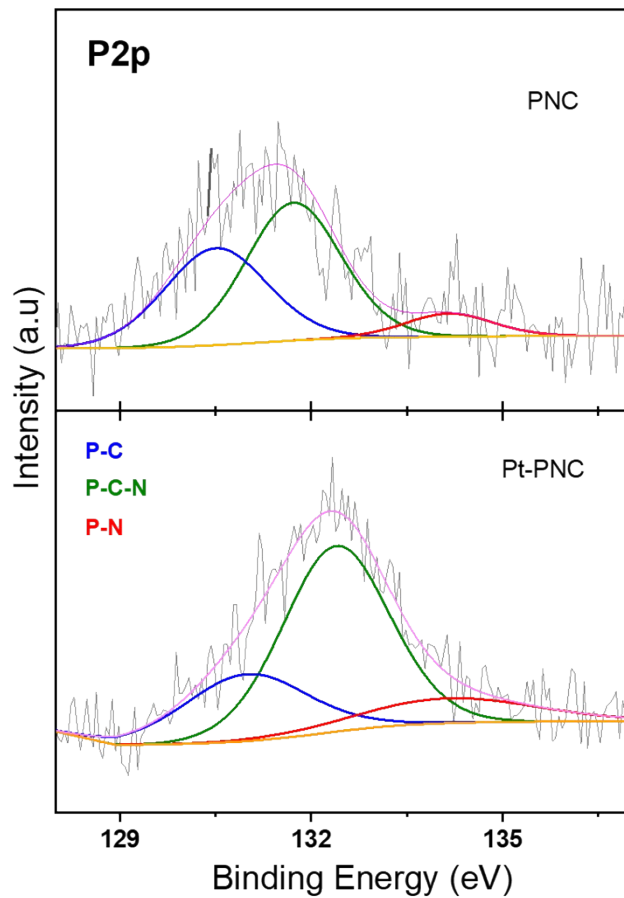

Fig. S7 XPS high resolution P2p spectrum.

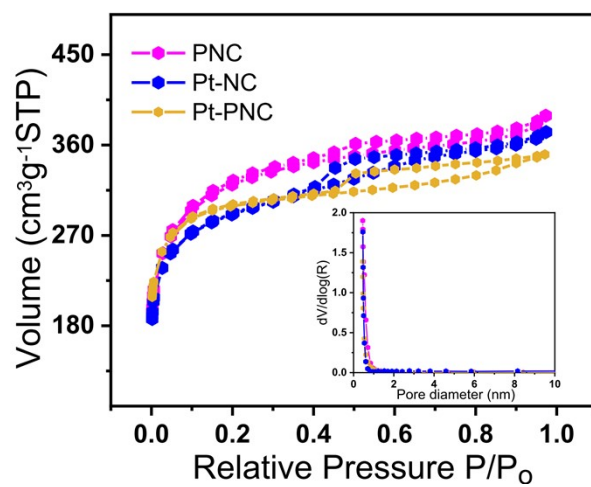

Fig. S8 N<sub>2</sub> adsorption-desorption isotherms (inset: pore size distribution).



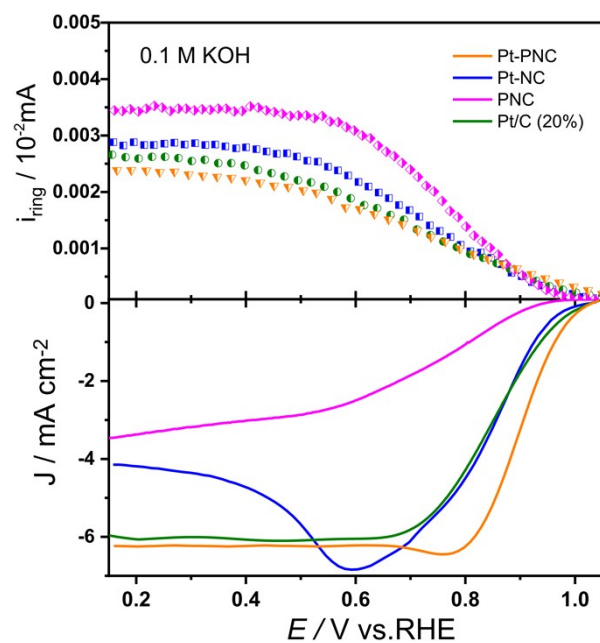

**Fig. S9** RRDE performance of Pt-PNC, Pt-NC, PNC and Pt/C (20%) under 0.1 M KOH.

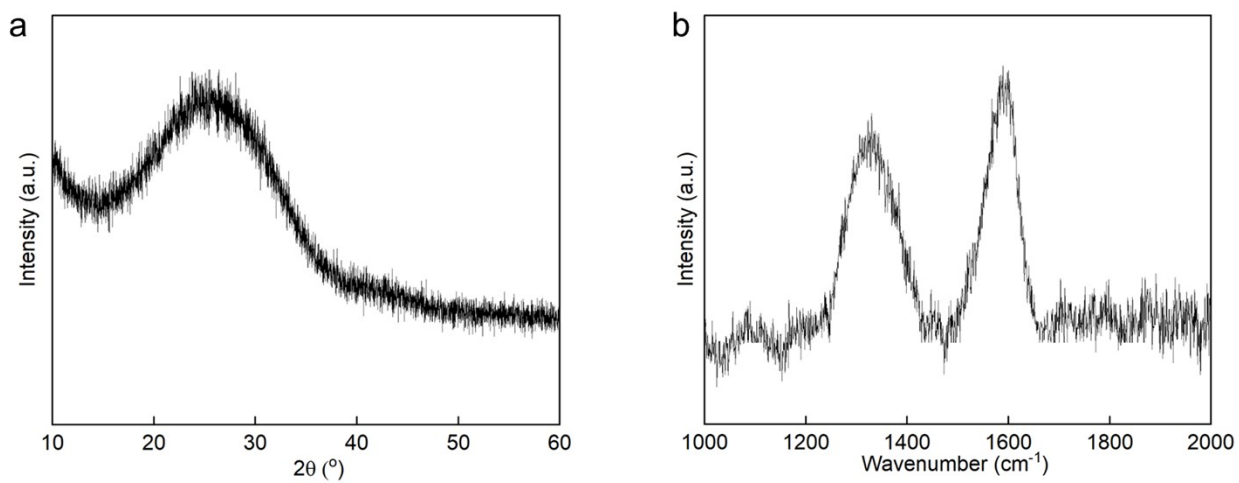

**Fig. S10** Post-stability characterization of the Pt-PNC catalyst after 10000 cycles at the range of 0.6-1.2 V vs RHE in 0.1 M KOH solution. (a) XRD profile. (b) Raman spectrum.

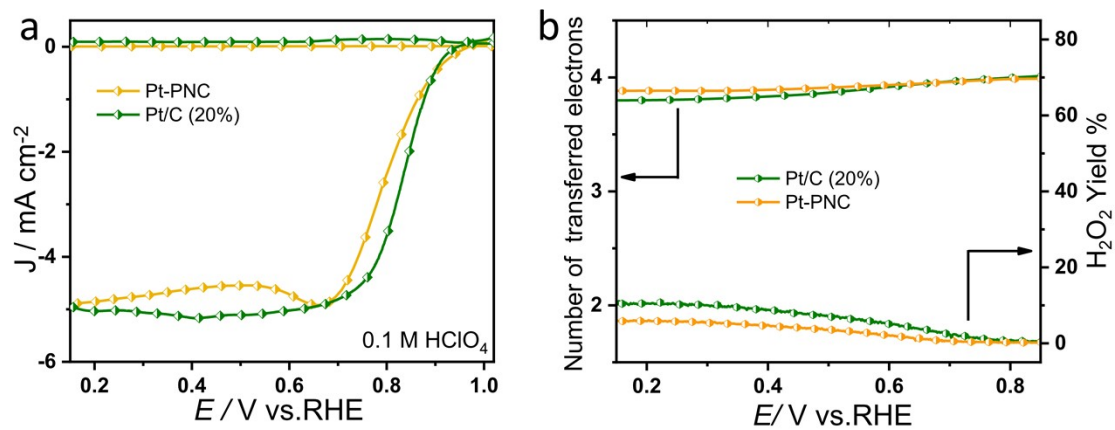

**Fig. S11** (a) RRDE performance of Pt-PNC, and Pt/C (20%) under 0.1 M HClO<sub>4</sub>. (b) Electron transferred number and peroxide% calculations.

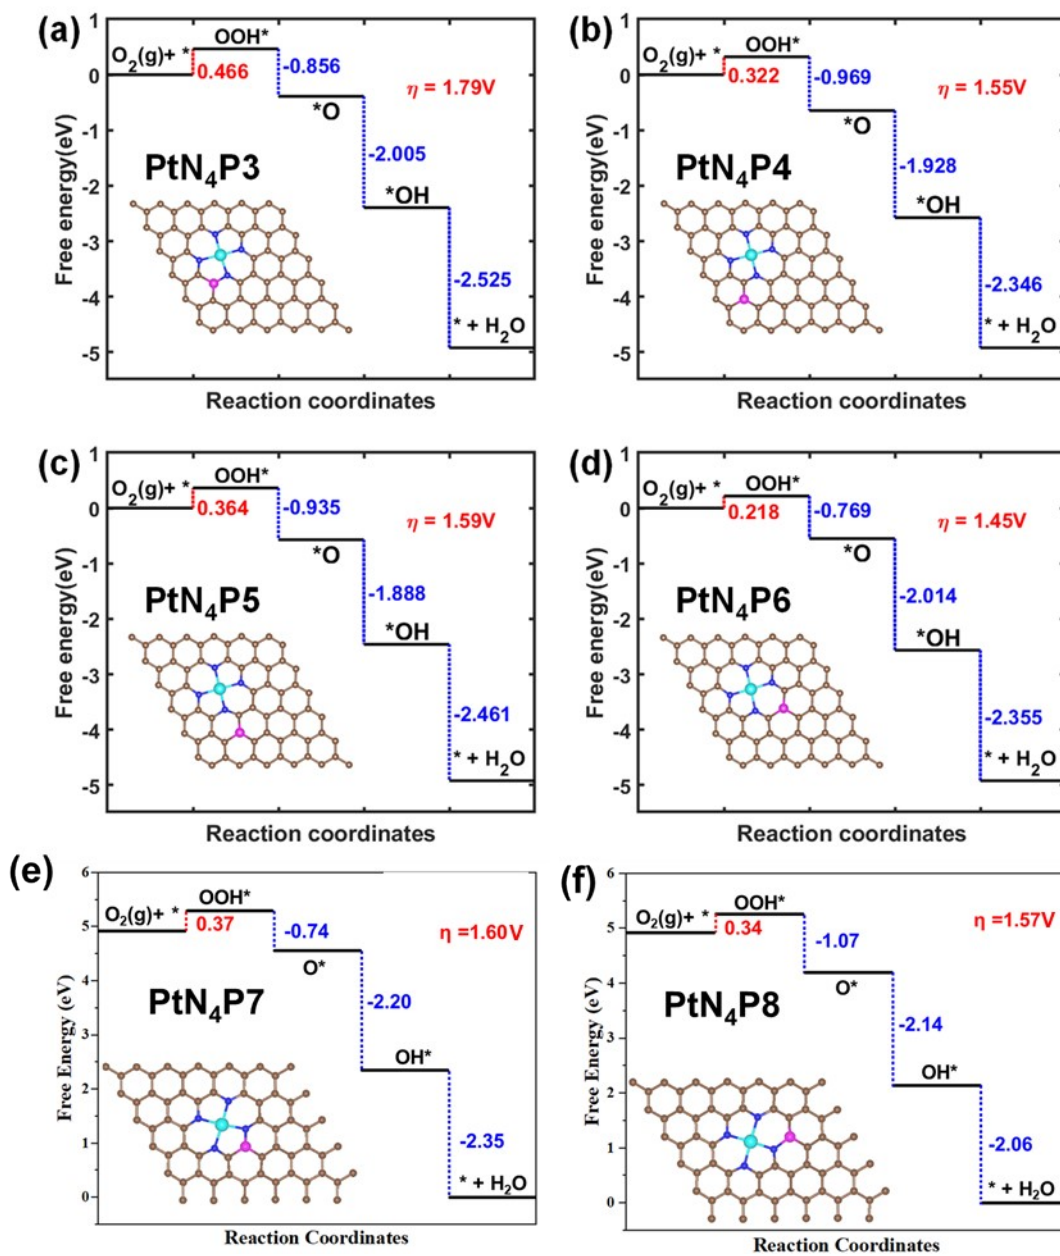

**Fig. S12** Free energy diagrams and configurations of six structures studied in our theoretical calculations. Color map: brown-C; cyan-Pt; blue-N; purple-P.

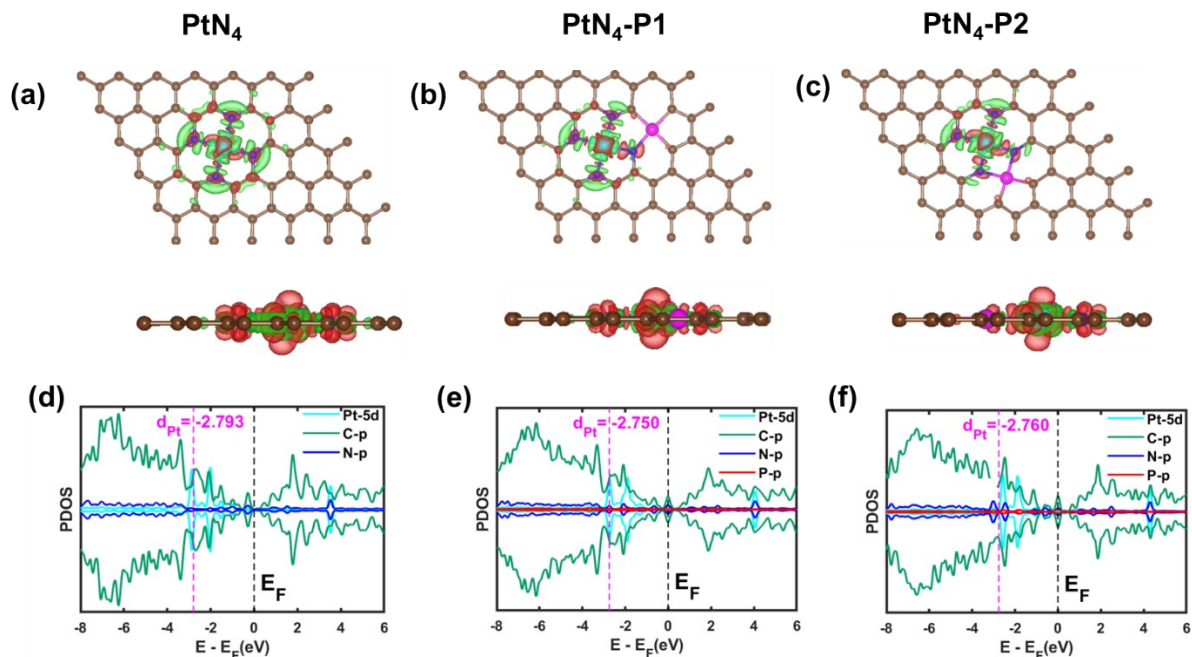

**Fig. S13** (a-c) Top and side views of partial electron density differences (PEDD) of Pt atom anchored on the doped-graphene (PtN<sub>4</sub>, PtN<sub>4</sub>-P1, PtN<sub>4</sub>-P2) monolayer. For the contour plots, the charge accumulation regions are rendered in blue while the charge depletion regions are shown in red. The contour value of the PEDD is  $\pm 0.005$  a.u. (d-f) Calculated spin-polarized partial density of states (PDOS) of Pt atom anchored on the doped-graphene (PtN<sub>4</sub>, PtN<sub>4</sub>-P1, PtN<sub>4</sub>-P2) monolayer. The Fermi level is fixed at the zero of energy and the d-band center ( $\epsilon_d$ ) is marked by the pink dashed line.

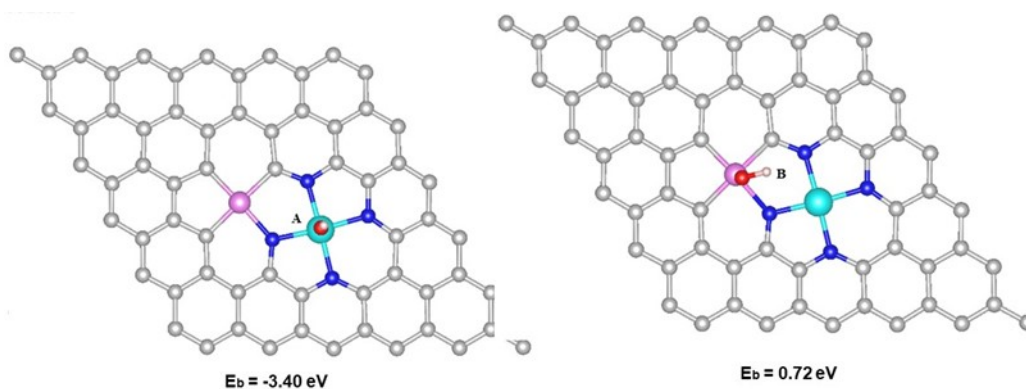

**Fig. S14** Binding energies of OH-molecules on site-A (on the top of Pt-atom) and site-B (on the top of P-atoms).

The turn-over frequency (TOF) is estimated (Angew. Chem. Int. Ed. 2019, 58, 9640-9645) by the following equation:  $TOF = J_k \times N_e / (\omega_{Pt} \times C_{cat} \times N_A / M_{Pt})$ , where  $J_k$  is the kinetic current density ( $A \text{ cm}^{-2}$ ),  $N_e$  is electron number per Coulomb  $6.24 \times 10^{18}$ ,  $\omega_{Pt}$  is the metal content in the catalyst,  $C_{cat}$  is the catalyst loading on the electrode,  $N_A$  is Avogadro constant  $6.02 \times 10^{23}$ ,  $M_{Pt}$  is molar mass of Pt  $195.1 \text{ g} \cdot \text{mol}^{-1}$ . As a result, we can get the relationship between the TOF and  $J_k$  to be  $TOF = 4659.7 J_k$  in our Pt-PNC and Pt-NC catalysts.

**Table S1.** Pt wt% calculated from ICP analysis.

| Catalyst  | wt%   |
|-----------|-------|
| Pt-PNC-1  | 0.086 |
| Pt-PNC -2 | 0.217 |
| Pt-PNC -3 | 0.243 |
| Pt-PNC -4 | 0.265 |
| Pt-PNC -5 | 0.331 |

**Table S2.** Elemental composition as determined by XPS analysis.

| Sample | C<br>(atm%) | N<br>(atm%) | P<br>(atm%) | Pt<br>(atm%) |
|--------|-------------|-------------|-------------|--------------|
| PNC    | 91.79       | 7.66        | 0.55        | -            |
| Pt-PNC | 95.13       | 4.11        | 0.45        | 0.31         |
| Pt-NC  | 92.94       | 6.76        | -           | 0.30         |

**Table S3.** EXAFS data fitting results of Pt-NC and Pt-PNC.

| Sample | Path   | CN       | $\sigma^2$     | Delta $E_0$ | R(Å)       | R-factor |
|--------|--------|----------|----------------|-------------|------------|----------|
| Pt-NC  | Pt-N/C | 3.6(0.6) | 0.0054(0.0011) | 3.29(1.39)  | 1.99(0.02) | 0.017    |
| Pt-PNC | Pt-N/C | 3.7(0.6) | 0.0049(0.0012) | 4.42(1.35)  | 2.01(0.02) | 0.018    |

The following values were determined from fits of the standards and were then held constant for the fits shown above; "CN" is the coordination number; Three times the estimated standard deviation is shown in parentheses following each value.  $\sigma^2$ , Debye-Waller factor, 0.0029 Å<sup>2</sup>; Interatomic distance = R (Å) (the bond length between central atoms and surrounding coordination atoms), R-factor (Goodness of fit) =  $\Sigma k^6(\chi_o - \chi_c)^2/N_p$  where  $\chi_o$ ,  $\chi_c$  are the observed and calculated EXAFS intensities, respectively and  $N_p$  is the number of points.

**Table S4.** Comparison of TOF in different catalysts for ORR

| Catalysts           | TOF (e <sup>-1</sup> site <sup>-1</sup> s <sup>-1</sup> ) | Reference |
|---------------------|-----------------------------------------------------------|-----------|
| <b>Pt-PNC</b>       | 15.0 (0.9 V)                                              | This work |
| <b>Pt-NC</b>        | 8.1 (0.9 V)                                               | This work |
| <b>Pt/C</b>         | 0.092 (0.9 V)                                             | This work |
| <b>Cu/CNT-8</b>     | 0.72 (0.85 V)                                             | 46        |
| <b>Cu-N/C</b>       | ~0.074 (0.85 V)                                           | 47        |
| <b>Co-N3 C1</b>     | 0.46 (0.8 V)                                              | 48        |
| <b>Cu-N@C</b>       | ~0.030 (0.85 V)                                           | 49        |
| <b>CPG-900</b>      | ~0.052 (0.85 V)                                           | 50        |
| <b>Fe SAs-HP</b>    | 5.99 (0.8 V)                                              | 51        |
| <b>Fe SACs</b>      | 4.3 (0.8 V)                                               | 52        |
| <b>sur-FeN4-HPC</b> | 1.63 (0.8 V)                                              | 53        |

**Table S5.** Comparative study of Pt-PNC with reported SACs/DACs in acidic electrolytes based on precious and non-precious electrocatalysts.

| Catalyst                | Active Site                                                      | $E_{\text{onset}}$ (V) | $E_{1/2}$ (V) | Electrolyte                          | Refs      |
|-------------------------|------------------------------------------------------------------|------------------------|---------------|--------------------------------------|-----------|
| Pt-PNC                  | Pt-N <sub>4</sub> P                                              | 0.98                   | 0.805         | 0.1 M HClO <sub>4</sub>              | This work |
| Pt <sub>1</sub> -N/BP   | Isolated Pt atoms anchored on N sites                            | -                      | 0.76          | 0.1 M HClO <sub>4</sub>              | 8         |
| Pt <sub>1</sub> @Fe-N-C | Pt <sub>1</sub> -O <sub>2</sub> -Fe <sub>1</sub> -N <sub>4</sub> | 0.93                   | 0.8           | 0.5 M H <sub>2</sub> SO <sub>4</sub> | 9         |
| Ru-N/G-750              | Ru-oxo-N <sub>4</sub>                                            | 0.89                   | 0.75          | 0.1 M HClO <sub>4</sub>              | 10        |

|                       |                                         |       |       |                                      |    |
|-----------------------|-----------------------------------------|-------|-------|--------------------------------------|----|
| Ir SAC                | IrN <sub>4</sub>                        | 0.97  | 0.864 | 0.1 M HClO <sub>4</sub>              | 11 |
| Fe ISAs/GHSs          | Fe-N <sub>x</sub>                       | 1.05  | 0.87  | 0.1 M KOH                            | 13 |
| Fe SAs/N-C            | Fe-N <sub>4</sub>                       | -     | 0.798 | 0.1 M HClO <sub>4</sub>              | 14 |
| FeSA-G                | Fe-N                                    | 0.95  | 0.804 | 0.1 M HClO <sub>4</sub>              | 16 |
| ZIF/MIL-10-900        | Fe-N <sub>4</sub>                       | -     | 0.78  | 0.1 M HClO <sub>4</sub>              | 17 |
| Fe <sub>SA</sub> -N-C | Fe-N <sub>4</sub>                       | 0.93  | 0.776 | 0.1 M HClO <sub>4</sub>              | 19 |
| Fe-ZIF                | Fe-N <sub>4</sub>                       | -     | 0.85  | 0.5 M H <sub>2</sub> SO <sub>4</sub> | 22 |
| Co-N-C@F127           | Co-N <sub>4</sub> , Co-N <sub>2+2</sub> | 0.93  | 0.84  | 0.5 M H <sub>2</sub> SO <sub>4</sub> | 28 |
| Co-NC (1100)          | Co-N <sub>4</sub>                       | -     | 0.80  | 0.5 M H <sub>2</sub> SO <sub>4</sub> | 31 |
| Cu-SAs/N-C            | Cu-N <sub>4</sub>                       | 0.83  | -     | 0.1 M HClO <sub>4</sub>              | 33 |
| Zn-N-C-1              | Zn-N <sub>4</sub>                       | -     | 0.743 | 0.1 M HClO <sub>4</sub>              | 36 |
| Cr/N/C-950            | Cr-N <sub>4</sub>                       | -     | 0.773 | 0.1 M HClO <sub>4</sub>              | 39 |
| (FeCo)/N-C            | (Fe-Co)N <sub>6</sub>                   | 1.06  | 0.863 | 0.1 M HClO <sub>4</sub>              | 41 |
| Co/Zn-NCNF            | (Zn-Co)N <sub>6</sub>                   | 0.997 | 0.797 | 0.1 M HClO <sub>4</sub>              | 43 |

**Table S6.** Comparative study of Pt-PNC with reported SACs/DACs in alkaline electrolytes based on precious and non-precious electrocatalysts.

| Catalyst            | Active Site                              | E <sub>onset</sub><br>(V) | E <sub>1/2</sub><br>(V) | Electrolyte | Zn-air<br>battery<br>(mW cm <sup>-2</sup> ) | Refs      |
|---------------------|------------------------------------------|---------------------------|-------------------------|-------------|---------------------------------------------|-----------|
| Pt-PNC              | Pt-N <sub>4</sub> P                      | 1.05                      | 0.91                    | 0.1 M KOH   | 247.8                                       | This work |
| Ag-MnO <sub>2</sub> | Isolated Ag atoms<br>on MnO <sub>2</sub> | 0.95                      | -                       | 1 M KOH     | 273.2                                       | 12        |
| Fe ISAs/GHSs        | Fe-N <sub>x</sub>                        | 1.05                      | 0.87                    | 0.1 M KOH   | -                                           | 13        |

|                                      |                                                             |       |       |           |       |    |
|--------------------------------------|-------------------------------------------------------------|-------|-------|-----------|-------|----|
| Fe SAs/N-C                           | Fe-N <sub>4</sub>                                           | -     | 0.91  | 0.1 M KOH | 225   | 14 |
| Fe-NC SAC                            | Fe-N <sub>x</sub>                                           | 0.98  | 0.90  | 0.1 M KOH | -     | 15 |
| Fe-NSDC                              | Fe-N <sub>x</sub>                                           | 0.96  | 0.84  | 0.1 M KOH | 225.1 | 18 |
| Fe <sub>SA</sub> -N-C                | Fe-N <sub>4</sub>                                           | 1.0   | 0.891 | 0.1 M KOH | -     | 19 |
| S <sub>2</sub> N-Fe/N/C-CNT          | Fe-N <sub>x</sub>                                           | -     | 0.85  | 0.1 M KOH | 102.7 | 20 |
| Fe-ISA/CN                            | Fe-N <sub>4</sub> with O <sub>2</sub> adsorbed on Fe-center | 0.986 | 0.90  | 0.1 M KOH | -     | 21 |
| CoN <sub>4</sub> /NG                 | CoN <sub>4</sub>                                            | 0.98  | 0.87  | 0.1 M KOH | 115   | 23 |
| EA-Co-900                            | Isolated Co-N Sites                                         | -     | 0.84  | 0.1 M KOH | 73    | 24 |
| SCoNC                                | Co-N <sub>4</sub>                                           | -     | 0.91  | 0.1 M KOH | 194   | 25 |
| Co-N <sub>3</sub> C <sub>1</sub> @GC | Co-N <sub>3</sub> C <sub>1</sub>                            | 0.913 | 0.854 | 0.1 M KOH | 225   | 26 |
| CoSAs/PTF-600                        | Co-N <sub>4</sub>                                           | -     | 0.808 | 0.1 M KOH | -     | 27 |
| NC-Co-SA                             | Co-N <sub>x</sub>                                           | 1.0   | 0.87  | 1 M KOH   | 20.9  | 29 |
| CoSAs/N-C(900)                       | Co-N <sub>2</sub>                                           | 0.982 | 0.881 | 0.1 M KOH |       | 30 |
| Cu ISAS/NC                           | CuN <sub>3</sub> -defective                                 | -     | 0.92  | 0.1 M KOH | 280   | 32 |
| Cu-SAs/N-C                           | Cu-N <sub>4</sub>                                           | 0.99  | 0.895 | 0.1 M KOH | -     | 33 |
| Cu-N-C                               | CuN <sub>2</sub> , CuN <sub>4</sub>                         | -     | 0.869 | 0.1 M KOH | -     | 34 |
| Mn/C-NO                              | Mn-N <sub>3</sub> O <sub>1</sub>                            | -     | 0.86  | 0.1 M KOH | 120   | 35 |
| Zn-N-C-1                             | Zn-N <sub>4</sub>                                           | -     | 0.873 | 0.1 M KOH | -     | 36 |
| SA-Zn-NHPC                           | Zn-N <sub>4</sub>                                           | 1.00  | 0.87  | 0.1 M KOH | -     | 37 |
| NiN <sub>4</sub> -C                  | Ni-N <sub>4</sub>                                           | ~0.97 | ~0.86 | 0.1 M KOH | -     | 38 |
| Fe-NiNC-50                           | Fe-Ni                                                       | 1.0   | 0.85  | 0.1 M KOH | 220   | 40 |
| Zn/CoN-C                             | (Zn-Co)N <sub>6</sub>                                       | 1.004 | 0.861 | 0.1 M KOH | 230   | 42 |
| Zn, Co-N <sub>x</sub> -C-Sy          | Zn, Co-N <sub>6</sub> -C-S                                  | -     | 0.893 | 0.1 M KOH | 150   | 44 |



|             |                       |      |      |           |       |    |
|-------------|-----------------------|------|------|-----------|-------|----|
| CoNi-SAs/NC | (Ni-Co)N <sub>6</sub> | 0.88 | 0.76 | 0.1 M KOH | 101.4 | 45 |
|-------------|-----------------------|------|------|-----------|-------|----|

## References

- 1 G. Kresse, J. Hafner, *Phys. Rev. B.*, 1993,**47**, 558.
- 2 G. Kresse, J. Furthmüller, *Phys. Rev. B*, 1996, **54**, 11169.
- 3 P. E. Blöchl, *Phys. Rev. B*, 1994, **50**, 17953.
- 4 J. Perdew, J. Chevary, S. Vosko, K. Jackson, M. Pederson, D. Singh, C. Fiolhais, *Phys. Rev. B*, 1992, **46**, 6671.
- 5 J. P. Perdew, Y. Wang, *Phys. Rev. B*, 1992, **45**, 13244.
- 6 S. Grimme, *J. Comput. Chem*, 2006, **27**, 1787-1799.
- 7 J. Nørskov, J. Rossmeisl, A. Logadottir, L. Lindqvist, J. R. Kitchin, T. Bligaard, and H. Jónsson, *J. Phys. Chem. B*, 2004, **108**, 17886-17892.
- 8 J. Liu, M. Jiao, L. Lu, H. M. Barkholtz, Y. Li, Y. Wang, L. Jiang, Z. Wu, D.-j. Liu, L. Zhuang, C. Ma, J. Zeng, B. Zhang, D. Su, P. Song, W. Xing, W. Xu, Y. Wang, Z. Jiang and G. Sun, *Nat. Commun.*, 2017, **8**, 15938.
- 9 X. Zeng, J. Shui, X. Liu, Q. Liu, Y. Li, J. Shang, L. Zheng and R. Yu, *Adv. Energy Mater.*, 2018, **8**, 1701345.
- 10 C. Zhang, J. Sha, H. Fei, M. Liu, S. Yazdi, J. Zhang, Q. Zhong, X. Zou, N. Zhao, H. Yu, Z. Jiang, E. Ringe, B. I. Yakobson, J. Dong, D. Chen and J. M. Tour, *ACS Nano*, 2017, **11**, 6930-6941.
- 11 M. Xiao, J. Zhu, G. Li, N. Li, S. Li, Z. P. Cano, L. Ma, P. Cui, P. Xu, G. Jiang, H. Jin, S. Wang, T. Wu, J. Lu, A. Yu, D. Su and Z. Chen, *Angew. Chem. Int. Ed.*, 2019, **58**, 9640-9645.
- 12 S. Ni, H. Zhang, Y. Zhao, X. Li, Y. Sun, J. Qian, Q. Xu, P. Gao, D. Wu, K. Kato, M. Yamauchi and Y. Sun, *Chem. Eng. J.*, 2019, **366**, 631-638.
- 13 X. Qiu, X. Yan, H. Pang, J. Wang, D. Sun, S. Wei, L. Xu and Y. Tang, *Adv. Sci.*, 2019, **6**, 1801103.
- 14 Z. Yang, Y. Wang, M. Zhu, Z. Li, W. Chen, W. Wei, T. Yuan, Y. Qu, Q. Xu, C. Zhao, X. Wang, P. Li, Y. Li, Y. Wu and Y. Li, *ACS Catal.*, 2019, **9**, 2158-2163.
- 15 L. Zhao, Y. Zhang, L.-B. Huang, X.-Z. Liu, Q.-H. Zhang, C. He, Z.-Y. Wu, L.-J. Zhang, J. Wu, W. Yang, L. Gu, J.-S. Hu and L.-J. Wan, *Nat. Commun.*, 2019, **10**, 1278.

- 16 Y. Cheng, S. He, S. Lu, J.-P. Veder, B. Johannessen, L. Thomsen, M. Saunders, T. Becker, R. De Marco, Q. Li, S.-z. Yang and S. P. Jiang, *Adv. Sci.*, 2019, **6**, 1802066.
- 17 X. Xu, Z. Xia, X. Zhang, R. Sun, X. Sun, H. Li, C. Wu, J. Wang, S. Wang and G. Sun, *Appl. Catal., B: Environ.*, 2019, **259**, 118042.
- 18 J. Zhang, M. Zhang, Y. Zeng, J. Chen, L. Qiu, H. Zhou, C. Sun, Y. Yu, C. Zhu and Z. Zhu, *Small*, 2019, **15**, 1900307.
- 19 L. Jiao, G. Wan, R. Zhang, H. Zhou, S.-H. Yu and H.-L. Jiang, *Angew. Chem. Int. Ed.*, 2018, **57**, 8525-8529.
- 20 P. Chen, T. Zhou, L. Xing, K. Xu, Y. Tong, H. Xie, L. Zhang, W. Yan, W. Chu, C. Wu and Y. Xie, *Angew. Chem. Int. Ed.*, 2017, **56**, 610-614.
- 21 Y. Chen, S. Ji, Y. Wang, J. Dong, W. Chen, Z. Li, R. Shen, L. Zheng, Z. Zhuang, D. Wang and Y. Li, *Angew. Chem. Int. Ed.*, 2017, **56**, 6937-6941.
- 22 H. Zhang, S. Hwang, M. Wang, Z. Feng, S. Karakalos, L. Luo, Z. Qiao, X. Xie, C. Wang, D. Su, Y. Shao and G. Wu, *J. Am. Chem. Soc.*, 2017, **139**, 14143-14149.
- 23 L. Yang, L. Shi, D. Wang, Y. Lv and D. Cao, *Nano Energy*, 2018, **50**, 691-698.
- 24 J. Zhao, R. Qin and R. Liu, *Appl. Catal., B: Environ.*, 2019, **256**, 117778.
- 25 J. Wu, H. Zhou, Q. Li, M. Chen, J. Wan, N. Zhang, L. Xiong, S. Li, B. Y. Xia, G. Feng, M. Liu and L. Huang, *Adv. Energy Mater.*, 2019, **9**, 1900149.
- 26 X. Hai, X. Zhao, N. Guo, C. Yao, C. Chen, W. Liu, Y. Du, H. Yan, J. Li, Z. Chen, X. Li, Z. Li, H. Xu, P. Lyu, J. Zhang, M. Lin, C. Su, S. J. Pennycook, C. Zhang, S. Xi and J. Lu, *ACS Catal.*, 2020, **10**, 5862-5870.
- 27 J.-D. Yi, R. Xu, G.-L. Chai, T. Zhang, K. Zang, B. Nan, H. Lin, Y.-L. Liang, J. Lv, J. Luo, R. Si, Y.-B. Huang and R. Cao, *J. Mater. Chem. A*, 2019, **7**, 1252-1259.
- 28 Y. He, S. Hwang, D. A. Cullen, M. A. Uddin, L. Langhorst, B. Li, S. Karakalos, A. J. Kropf, E. C. Wegener, J. Sokolowski, M. Chen, D. Myers, D. Su, K. L. More, G. Wang, S. Litster and G. Wu, *Energy Environ. Sci.*, 2019, **12**, 250-260.
- 29 W. Zang, A. Sumboja, Y. Ma, H. Zhang, Y. Wu, S. Wu, H. Wu, Z. Liu, C. Guan, J. Wang and S. J. Pennycook, *ACS Catal.*, 2018, **8**, 8961-8969.

- 30 P. Yin, T. Yao, Y. Wu, L. Zheng, Y. Lin, W. Liu, H. Ju, J. Zhu, X. Hong, Z. Deng, G. Zhou, S. Wei and Y. Li, *Angew. Chem. Int. Ed.*, 2016, **55**, 10800-10805.
- 31 X. X. Wang, D. A. Cullen, Y.-T. Pan, S. Hwang, M. Wang, Z. Feng, J. Wang, M. H. Engelhard, H. Zhang, Y. He, Y. Shao, D. Su, K. L. More, J. S. Spendelow and G. Wu, *Adv. Mater.*, 2018, **30**, 1706758.
- 32 Z. Yang, B. Chen, W. Chen, Y. Qu, F. Zhou, C. Zhao, Q. Xu, Q. Zhang, X. Duan and Y. Wu, *Nat. Commun.*, 2019, **10**, 3734.
- 33 Y. Qu, Z. Li, W. Chen, Y. Lin, T. Yuan, Z. Yang, C. Zhao, J. Wang, C. Zhao, X. Wang, F. Zhou, Z. Zhuang, Y. Wu and Y. Li, *Nat. Catal.*, 2018, **1**, 781-786.
- 34 F. Li, G.-F. Han, H.-J. Noh, S.-J. Kim, Y. Lu, H. Y. Jeong, Z. Fu and J.-B. Baek, *Energy Environ. Sci.*, 2018, **11**, 2263-2269.
- 35 Y. Yang, K. Mao, S. Gao, H. Huang, G. Xia, Z. Lin, P. Jiang, C. Wang, H. Wang and Q. Chen, *Adv. Mater.*, 2018, **30**, 1801732.
- 36 J. Li, S. Chen, N. Yang, M. Deng, S. Ibraheem, J. Deng, J. Li, L. Li and Z. Wei, *Angew. Chem. Int. Ed.*, 2019, **58**, 7035-7039.
- 37 N. Wang, Z. Liu, J.-Y. Ma, J. Liu, P. Zhou, Y. Chao, C. Ma, X. Bo, J. Liu, Y. Hei, Y. Bi, M. Sun, M. Cao, H. Zhang, F. Chang, H.-L. Wang, P. Xu, Z. Hu, J. Bai, H. Sun, G. Hu and M. Zhou, *ACS Sustainable Chem. Eng.*, 2020, **8**, 13813–13822.
- 38 Z. Cai, P. Du, W. Liang, H. Zhang, P. Wu, C. Cai and Z. Yan, *J. Mater. Chem. A*, 2020, **8**, 15012-15022.
- 39 E. Luo, H. Zhang, X. Wang, L. Gao, L. Gong, T. Zhao, Z. Jin, J. Ge, Z. Jiang, C. Liu and W. Xing, *Angew. Chem. Int. Ed.*, 2019, **58**, 12469-12475.
- 40 X. Zhu, D. Zhang, C.-J. Chen, Q. Zhang, R.-S. Liu, Z. Xia, L. Dai, R. Amal and X. Lu, *Nano Energy*, 2020, **71**, 104597.
- 41 J. Wang, Z. Huang, W. Liu, C. Chang, H. Tang, Z. Li, W. Chen, C. Jia, T. Yao, S. Wei, Y. Wu and Y. Li, *J. Am. Chem. Soc.*, 2017, **139**, 17281-17284.
- 42 Z. Lu, B. Wang, Y. Hu, W. Liu, Y. Zhao, R. Yang, Z. Li, J. Luo, B. Chi, Z. Jiang, M. Li, S. Mu, S. Liao, J. Zhang and X. Sun, *Angew. Chem. Int. Ed.*, 2019, **58**, 2622-2626.

- 43 J. Zang, F. Wang, Q. Cheng, G. Wang, L. Ma, C. Chen, L. Yang, Z. Zou, D. Xie and H. Yang, *J. Mater. Chem. A*, 2020, **8**, 3686-3691.
- 44 D. Liu, B. Wang, H. Li, S. Huang, M. Liu, J. Wang, Q. Wang, J. Zhang and Y. Zhao, *Nano Energy*, 2019, **58**, 277-283.
- 45 X. Han, X. Ling, D. Yu, D. Xie, L. Li, S. Peng, C. Zhong, N. Zhao, Y. Deng and W. Hu, *Adv. Mater.*, 2019, **31**, 1905622.
- 46 G. Han, X. Zhang, W. Liu, Q. Zhang, Z. Wang, J. Cheng, T. Yao, L. Gu, C. Du, Y. Gao, G. Yin, *Nature communications* 2021, **12**, 6335.
- 47 Q. Lai, Y. Zhao, J. Zhu, Y. Liang, J. He, J. Chen, *ChemElectroChem* 2018, **5**, 1822-1826.
- 48 X. Hai, X. Zhao, N. Guo, C. Yao, C. Chen, W. Liu, Y. Du, H. Yan, J. Li, Z. Chen, X. Li, Z. Li, H. Xu, P. Lyu, J. Zhang, M. Lin, C. Su, S. J. Pennycook, C. Zhang, S. Xi, J. Lu, *ACS Catal.* 2020, **10**, 5862-5870.
- 49 H. Wu, H. Li, X. Zhao, Q. Liu, J. Wang, J. Xiao, S. Xie, R. Si, F. Yang, S. Miao, X. Guo, G. Wang, X. Bao, *Energy & Environmental Science* 2016, **9**, 3736-3745.
- 50 J. Wang, K. Wang, F.-B. Wang, X.-H. Xia, *Nature communications* 2014, **5**, 5285.
- 51 P. Zhang, H.-C. Chen, H. Zhu, K. Chen, T. Li, Y. Zhao, J. Li, R. Hu, S. Huang, W. Zhu, Y. Liu, Y. Pan, *Nature communications* 2024, **15**, 2062.
- 52 Z. Jin, P. Li, Y. Meng, Z. Fang, D. Xiao, G. Yu, *Nature Catalysis* 2021, **4**, 615-622.
- 53 G. Chen, Y. An, S. Liu, F. Sun, H. Qi, H. Wu, Y. He, P. Liu, R. Shi, J. Zhang, A. Kuc, U. Kaiser, T. Zhang, T. Heine, G. Wu, X. Feng, *Energy & Environmental Science* 2022, **15**, 2619-2628.
